# Supplementary material
Source: PubMed Central journal article supplement (PMC5340580)
Supplement: NIHMS827564-supplement-1.pdf [file NIHMS827564-supplement-1.pdf]

Supplemental Table 1:

| Surgical Group               | Sham      | Sham-pf       | DES           |
|------------------------------|-----------|---------------|---------------|
| Food Intake (g)              | 259.1±7.3 | 222.5±3.4*    | 220.7±19.6*   |
| Body Weight Δ (g)            | 7.3±5.0   | -50.3±4.7**** | -46.9±8.0**** |
| Fat Mass Δ (g)               | 32.8±1.6  | -0.2±8.9***   | 12.3±4.9**    |
| ip Glucose Tolerance (AUC)   | 9967±527  | 8174±616*     | 6628±1069**   |
| oral Glucose Tolerance (AUC) | 5645±595  | 6380±1003     | 2835±618 *#   |
| GLP1 (pg/mL)                 | 5.4±0.78  | 10.0±1.1      | 19.0±3.5***   |
| Insulin (pg/mL)              | 4.1±0.24  | 1.5±0.19      | 1.7±0.18*     |
| Glucagon (pg/mL)             | 84.3±23.6 | 45.1±10.5     | 208.9±80.0*#  |
| Bile Acids (μmol/L)          | 24.5±4.1  | 18.4±3.0      | 41.0±7.2*##   |

Metabolic Parameters of DES Rats. Food intake over 28 d study, peak body weight loss (d 7) and 14 d fat mass loss, AUC of glucose excursion during ip Glucose or mixed meal challenge, active GLP1 30 min after mixed meal challenge, and fasting insulin, glucagon and plasma bile acids. All data are represented as mean +/- SEM, \* $p < 0.05$ , \*\* $p < 0.01$ , \*\*\*  $p < 0.001$ , \*\*\*\*  $p < 0.0001$  vs. Sham control, # $p < 0.05$ , ## $p < 0.01$  vs. Sham-pf control.
